# Supplementary material
Source: PubMed Central journal article supplement (PMC7092802)
Supplement: NEJMoa2001191_appendix.pdf [file NEJMoa2001191_appendix.pdf]

## Supplementary Appendix

This appendix has been provided by the authors to give readers additional information about their work.

Supplement to: Holshue ML, DeBolt C, Lindquist S, et al. First case of 2019 novel coronavirus in the United States. N Engl J Med 2020;382:929-36. DOI: 10.1056/NEJMoa2001191

Table of Contents

**Washington State 2019-nCoV case investigation team – pg 2**

**Washington State 2019-nCoV case investigation team:  
Washington State Department of Health:**

Cynthia Harry, MSPH  
Mike Boysun, MPH  
Jasmine Matheson, MPH  
Denny Russell, BS  
Brian Hiatt, BS  
Sara Podczervinski, MPH  
Larissa Lewis, BSN  
Patricia Montgomery, MPH  
Wayne Turnberg, PhD  
Nicholas R. Graff, MPH  
Tia KH Dostal, MPH  
Esther W. Lam, MPH  
Mary Chan, MPH  
Vivian Hawkins, PhD  
Matt Zimmerman, BS  
Kevin Wickersham, MS  
Xinyao deGrauw, MD, PhD  
Kim Peifer, MPH  
Elyse Bevers, MPH  
Tessa Fairfortune, MPH

**US Centers for Disease Control and Prevention:**

Claire M. Midgley, PhD  
Stephanie Kujawski, PhD  
Eileen Schneider, MD  
John T. Watson, MD  
Jennifer Hunter, PhD  
Marie E. Killerby, VetMB  
Brian Rha, MD  
Sara Oliver, MD  
Melissa Rolfes, PhD  
Aron Hall, DVM  
Alicia Fry, MD  
Dan Jernigan, MD  
Victoria Chu, MD  
Hannah Kirling, MD  
Krista Queen, PhD  
Ying Tao, PhD  
Yan Li, Ms.C  
Clinton R. Paden, PhD  
Jing Zhang, PhD
